# Supplementary material
Source: PubMed Central journal article supplement (PMC6071953)
Supplement: MD-008-C7MD00174F-s001.pdf [file MD-008-C7MD00174F-s001.pdf]

## Supporting information

### Synergic modulation of inflammatory state of macrophages utilizing anti-oxidant and phosphatidylserine containing polymer-lipid hybrid nanoparticles

Md. Zahangir Hosain, Kazuki Yuzuriha, Khadijah, Masafumi Takeo, Akihiro Kishimura, Yoshihiko Murakami, Takeshi Mori and Yoshiki Katayama

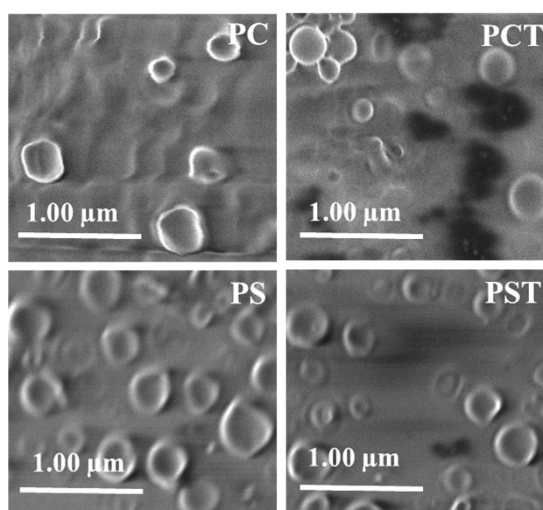

**Fig. S1.** Scanning electron microscopic images of the PLNPs.

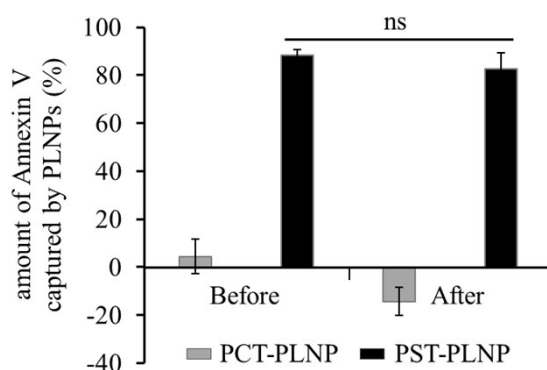

**Fig. S2.** Effect of acid treatment of PLNPs on their binding capacity against PS-specific Annexin V.

## Methods

### Effect of acid treatment of PLNPs on binding capacity against Annexin V

PLNPs (10 mg/mL) were treated with HCl-KCl solution (pH 1.2) with shaking for 4 h at 37°C. After neutralization with phosphate buffer to pH 7.0, PLNPs were collected by centrifugation at 13000 g followed by washing with MilliQ water for 3 times. PLNPs were dispersed in 160- $\mu$ L of binding buffer (50 mM HEPES containing 750 mM NaCl, 25 mM KCl, 5 mM MgCl<sub>2</sub>, and 9 mM CaCl<sub>2</sub> (pH7.4)). To the dispersion, 10- $\mu$ L of aqueous solution of FITC-Annexin V (1  $\mu$ M) was added and then incubated for 30 min at room temperature. Then, PLNPs were precipitated by centrifugation at 13000 g for 15 min. A fluorescence resulting from remaining FITC-Annexin V in the supernatant was measured by microplate reader.

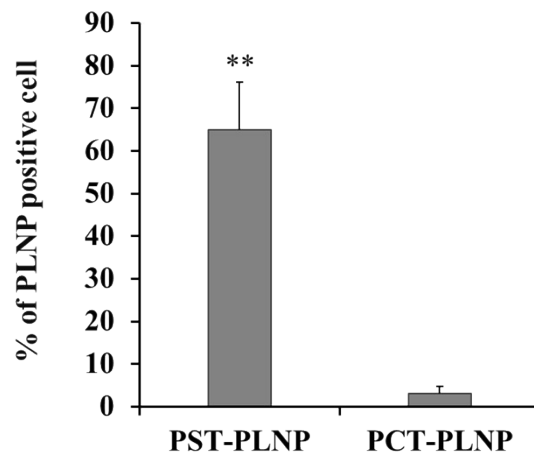

Fig. S3. Quantification of cellular uptake of PLNPs by image-based cytometer (\*\*,  $p < 0.01$ ).
